# Supplementary material for: Twenty-Year Trends in Outcomes for Older Adults With Acute Myocardial Infarction in the United States
Source: PubMed Central journal article supplement (PMC6484647; doi:10.1001/jamanetworkopen.2019.1938), 2019-03-15

## Supplementary Online Content

Krumholz HM, Normand S-LT, Wang Y. Twenty-year trends in outcomes for older adults with acute myocardial infarction in the United States. *JAMA Netw Open*.

2019;2(3):e191938 doi:10.1001/jamanetworkopen.2019.1938

**eTable.** County-Specific Characteristics

**eFigure 1.** Change in Number of Initial AMI Hospitalizations per 100,000 Beneficiary-Years, 1995-2014

**eFigure 2.** Annual Relative Changes in Patient Characteristics

**eFigure 3.** Trend in Observed Mortality by Year and Sub-population

**eFigure 4.** Changes in Patient Risk of 30-Day Mortality Between 2014 and 1995 by Sub-population

**eFigure 5.** Nationwide Change in Hospital-Specific 30-Day Risk-Standardized Mortality Rate by Selected Years

**eFigure 6.** Hospital Characteristics Associated With Change in Difference in Hospital-Specific Risk-Standardized 30-Day Mortality Rates Between 1995 and 2014

**eFigure 7.** Change in County-Specific Risk-Standardized 30-Day Mortality in 1995-1998 (Top Panel) and in 2011-2014 (Bottom Panel)

**eFigure 8.** County-Specific Characteristics Associated With Difference in County-Specific Risk-Standardized 30-Day Mortality Between 1995-1998 and 2011-2014

**eFigure 9.** Association Between Medicare Inpatient Payment and 30-Day Risk-Standardized Mortality at the Hospital Level

**eFigure 10.** Annual Changes in the 30-Day Rates of Three Common AMI-Specific Procedures (Catheterization, CABG, and PCI)

This supplementary material has been provided by the authors to give readers additional information about their work.

**eTable. County-specific characteristics.**

|                                                                                               |
|-----------------------------------------------------------------------------------------------|
| Proportion of senior population (age ≥65) (%)                                                 |
| Divorced (%)                                                                                  |
| Residence one year ago (%) - Different house in the U.S. - different county                   |
| <b>Geography</b>                                                                              |
| Rural area residents (%)                                                                      |
| In health priority area (yes/no)                                                              |
| <b>Socioeconomic Status</b>                                                                   |
| Bachelor or higher degree (%)                                                                 |
| Consumer Price Index-adjusted median income (\$10,000)                                        |
| Proportion of population under the poverty level (%)                                          |
| Eligible for both Medicare and Medicaid (dual-eligible) (%)                                   |
| Gini coefficient, continuous (0 to 1)                                                         |
| Percent of unemployed in 2010 (%)                                                             |
| <b>General Health</b>                                                                         |
| Age-adjusted prevalence of adult diabetes (%)                                                 |
| At least 1 ambulatory visit to a primary care clinician (%)                                   |
| Years of potential life lost                                                                  |
| Emergency department visit rate (%)                                                           |
| <b>Availability of Care</b>                                                                   |
| Percent of diabetic Medicare beneficiaries receiving HbA1c test (%)                           |
| Percent of female Medicare beneficiaries having at least 1 mammogram in 2 yrs (age 67-69) (%) |
| Enrolled in Medicare Advantage for all 12 months (%)                                          |
| Not enrolled in supplementary medical insurance (Medicare Part B) (%)                         |
| <b>Health Behaviors</b>                                                                       |
| Age-adjusted rate of physical inactivity (%)                                                  |

**eFigure 1. Change in number of initial AMI hospitalizations per 100,000 beneficiary-years, 1995-2014.**

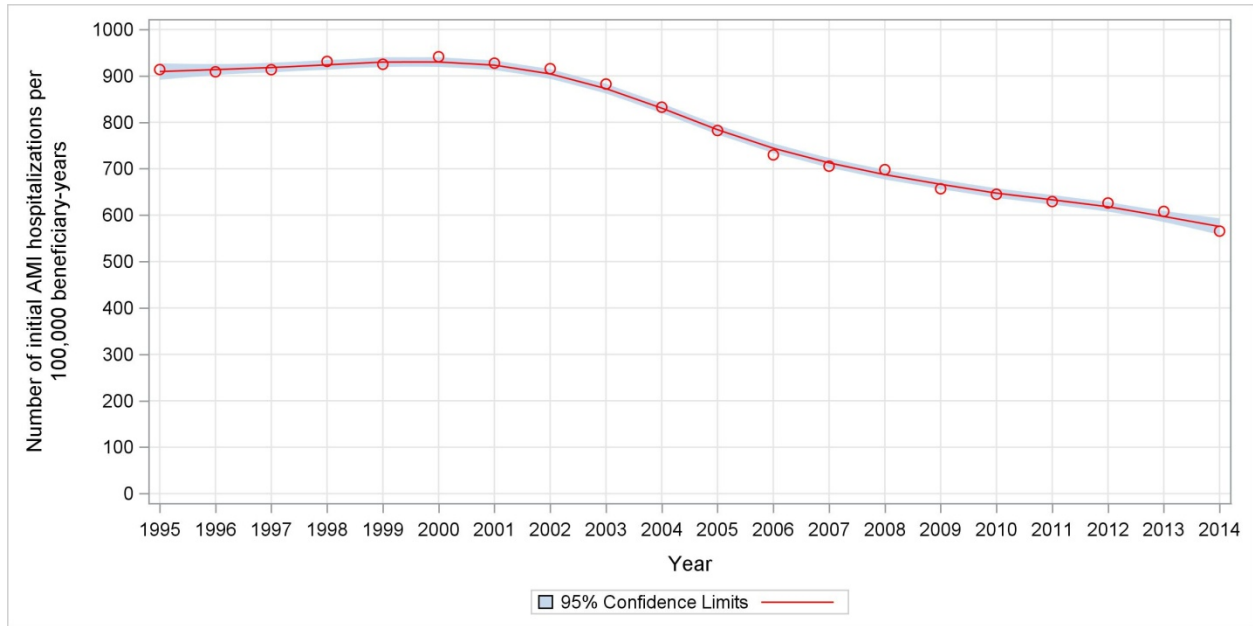

**eFigure 2. Annual relative changes in patient characteristics.**

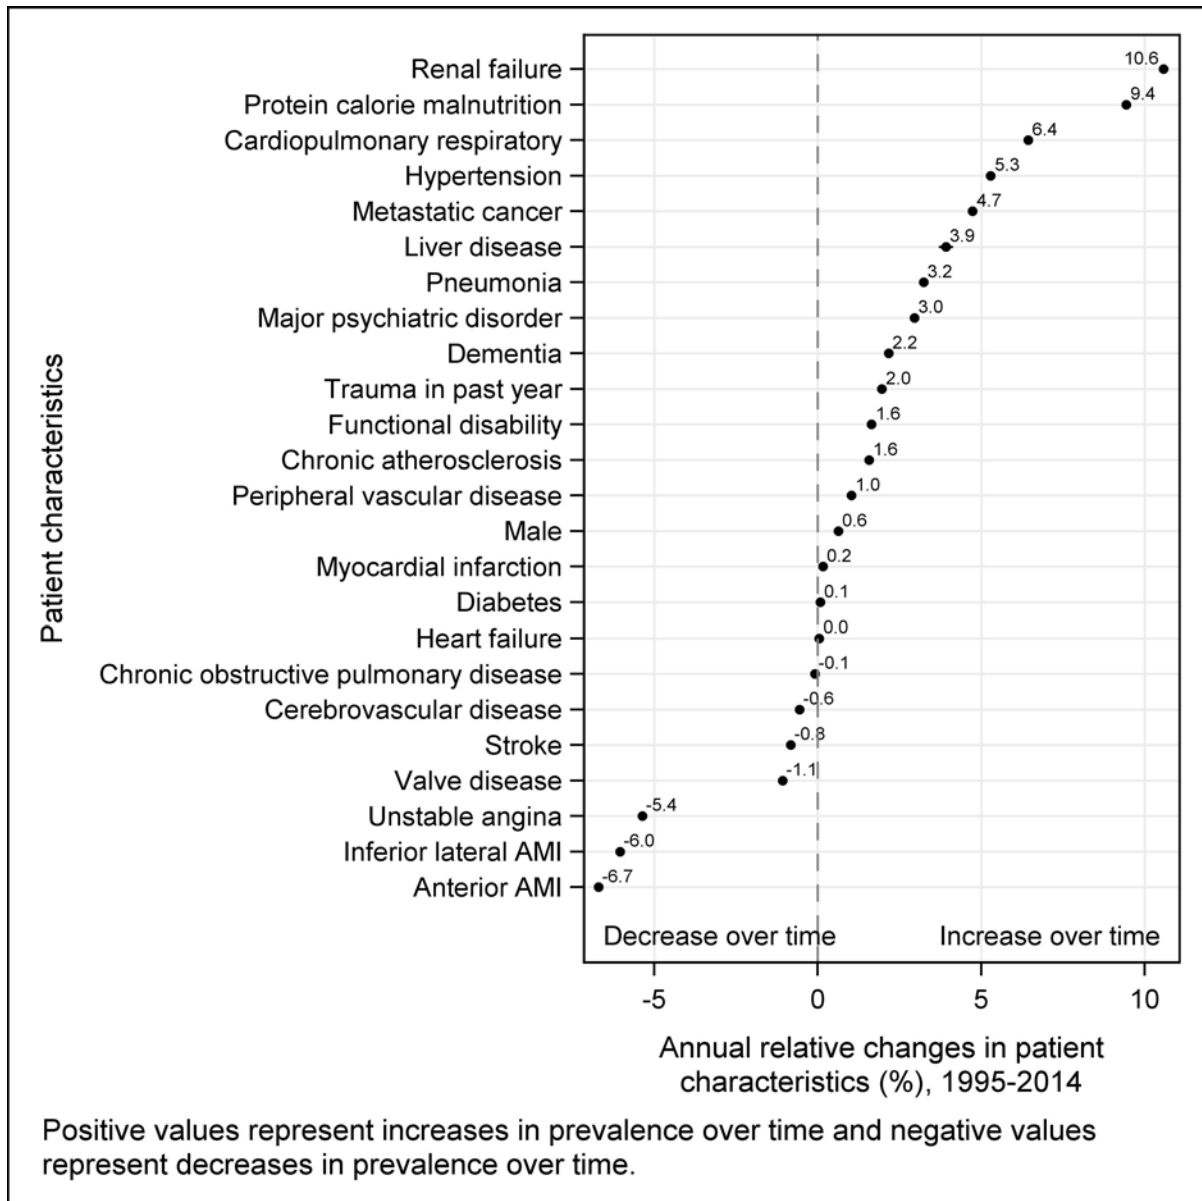

**eFigure 3. Trend in observed mortality by year and sub-population.**

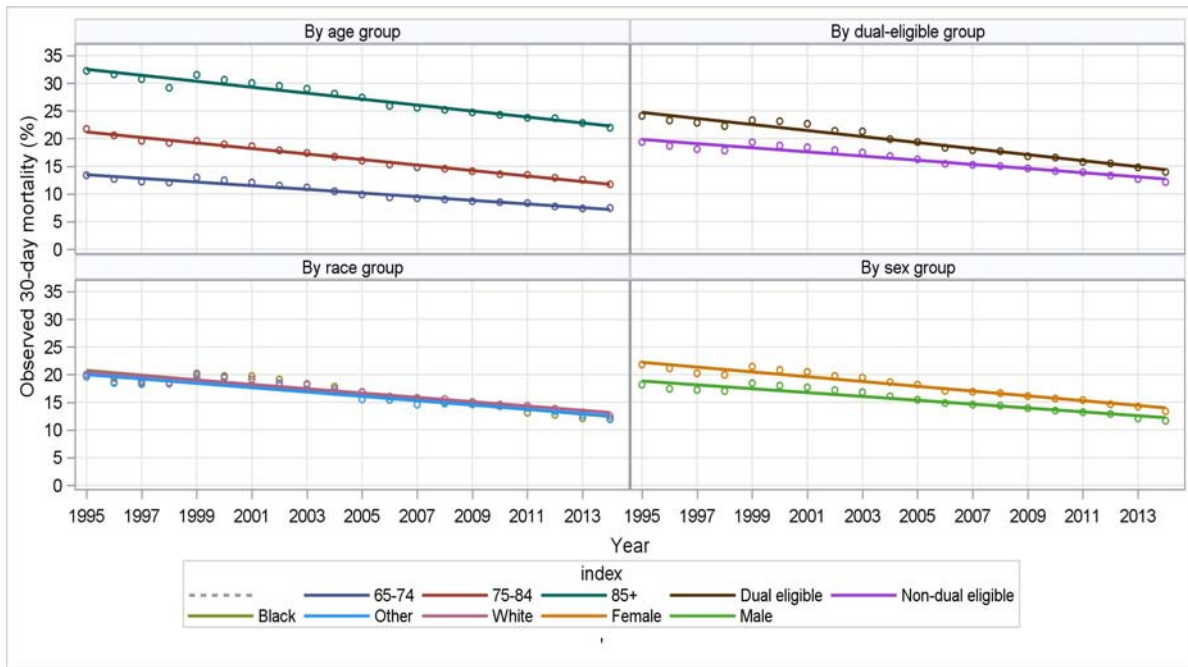

**eFigure 4. Changes in patient risk of 30-day mortality between 2014 and 1995 by sub-population.**

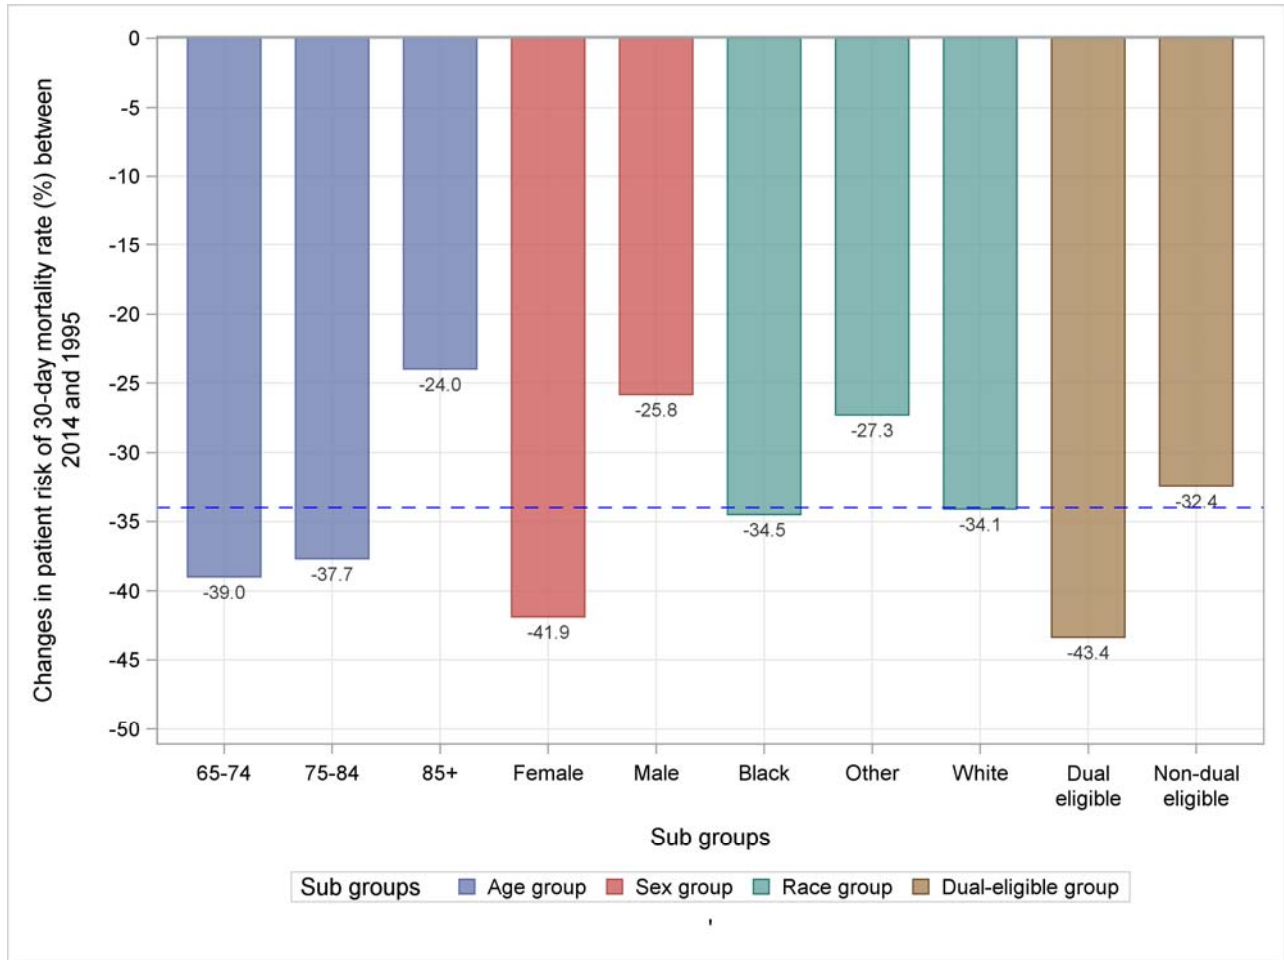

**eFigure 5. Nationwide change in hospital-specific 30-day risk-standardized mortality rate by selected years.**

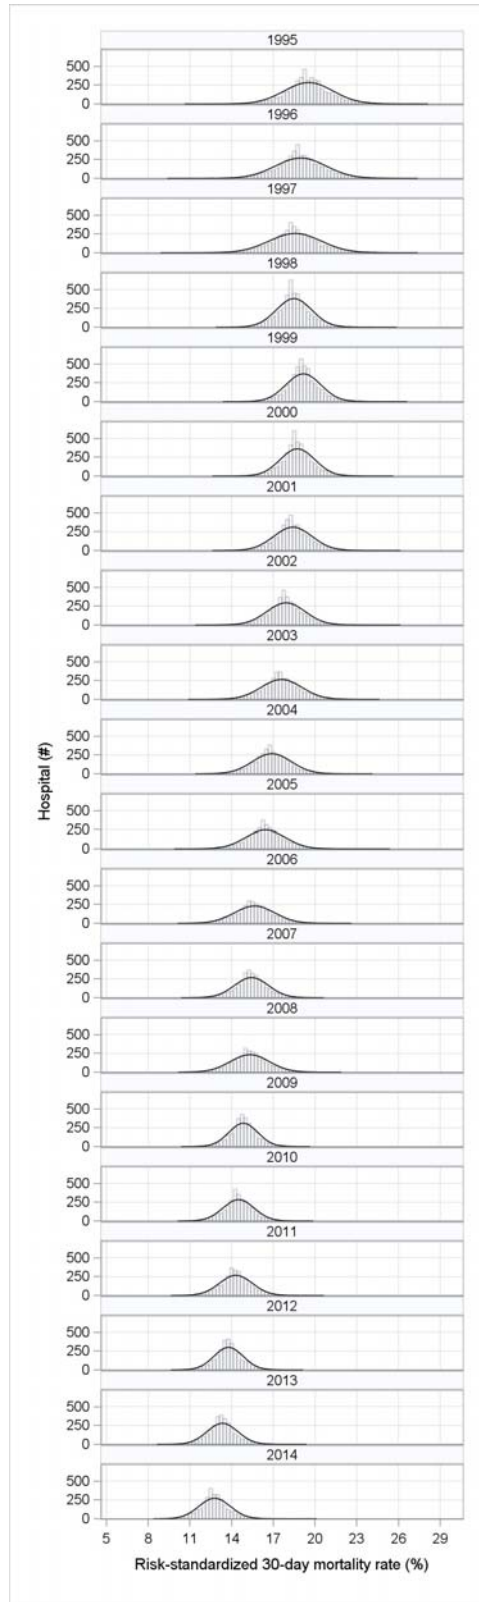

**eFigure 6. Hospital characteristics associated with change in difference in hospital-specific risk-standardized 30-day mortality rates between 1995 and 2014.**

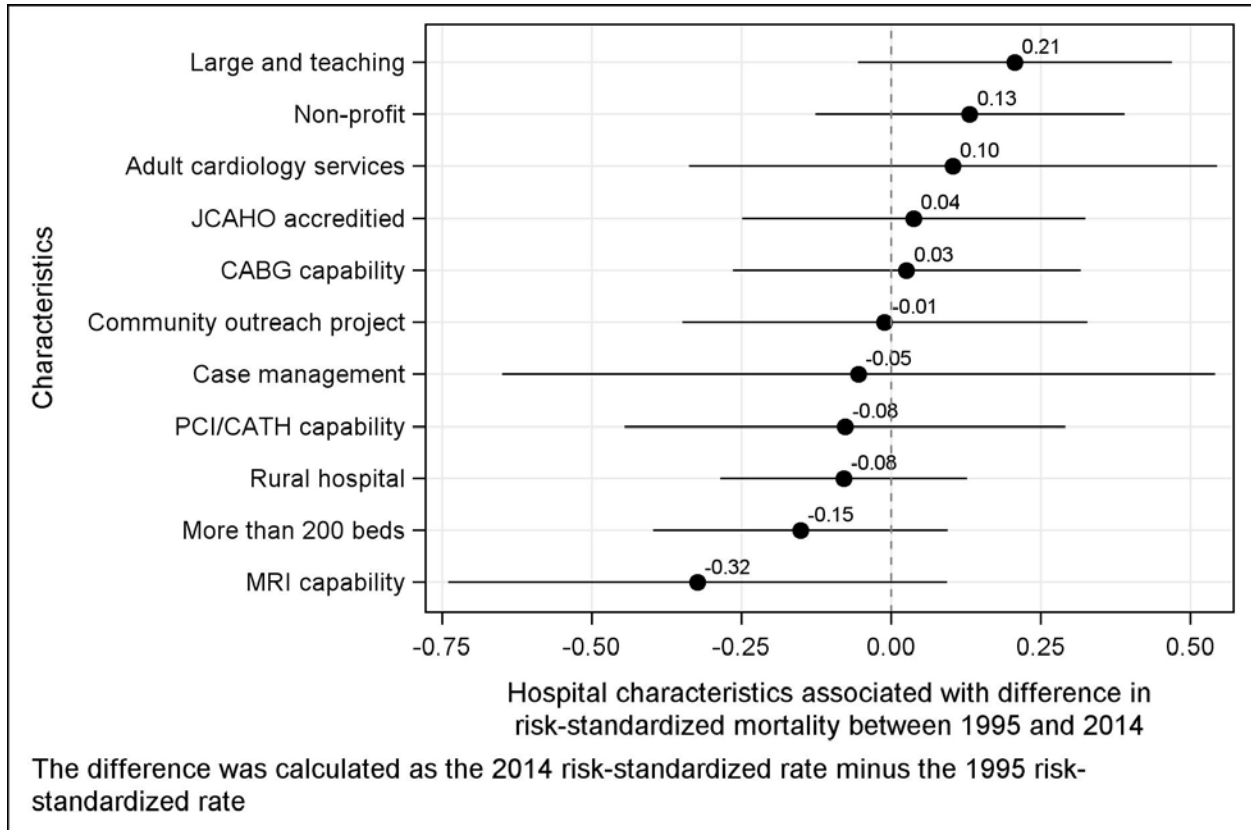



**eFigure 7. Change in county-specific risk-standardized 30-day mortality in 1995-1998 (top panel) and in 2011-2014 (bottom panel).  
 Note: The mortality rate in the highest regions in 2011-2014 was lower than the mortality rate in the lowest regions in 1995-1998.**

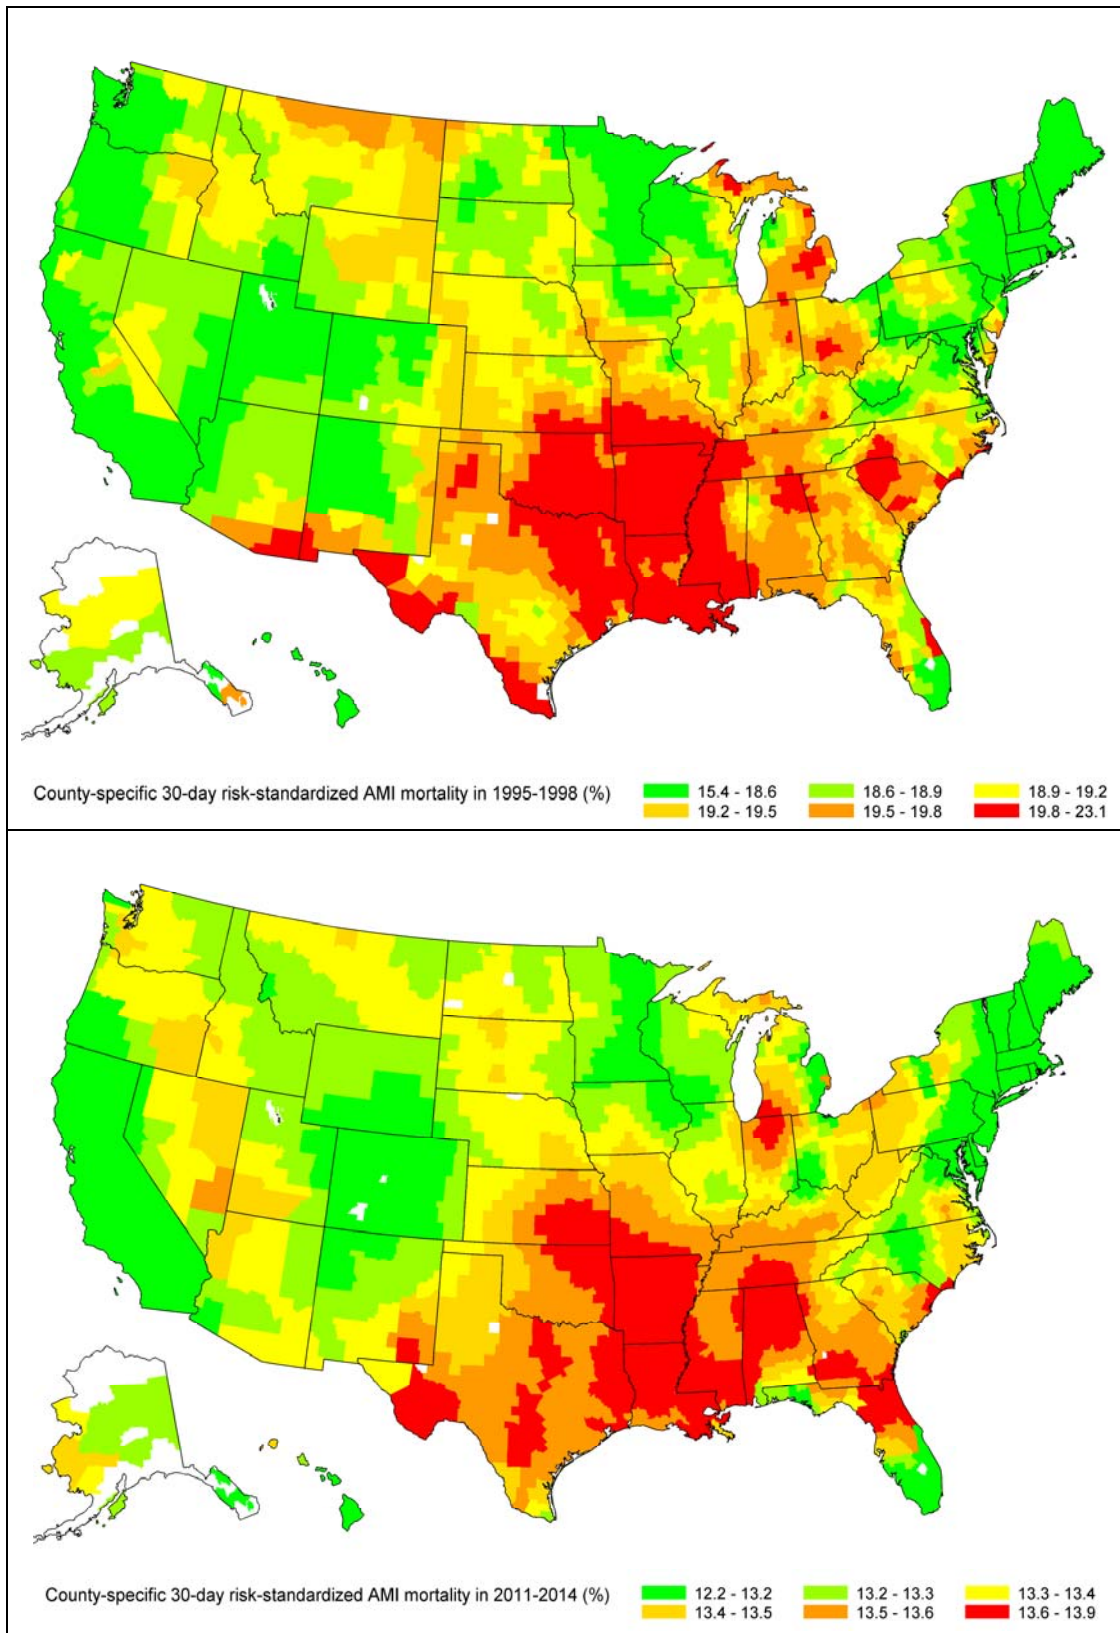

**eFigure 8. County-specific characteristics associated with difference in county-specific risk-standardized 30-day mortality between 1995-1998 and 2011-2014.**

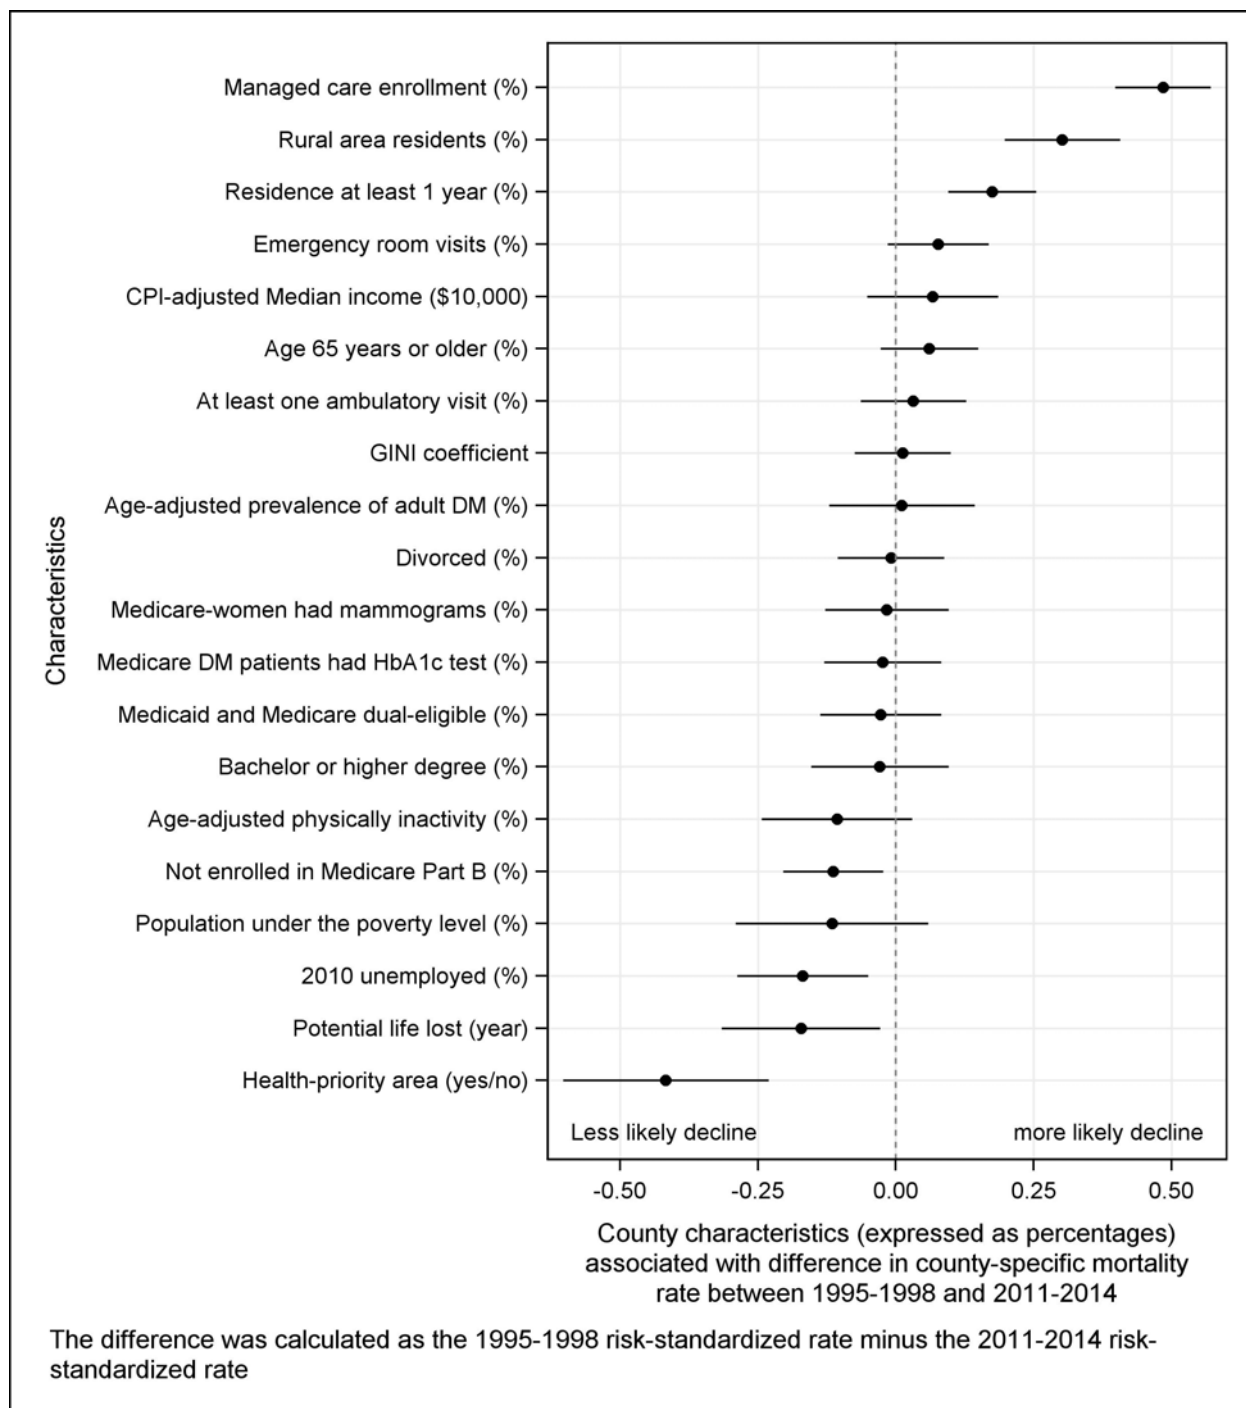

**eFigure 9. Association between Medicare inpatient payment and 30-day risk-standardized mortality at the hospital level.**

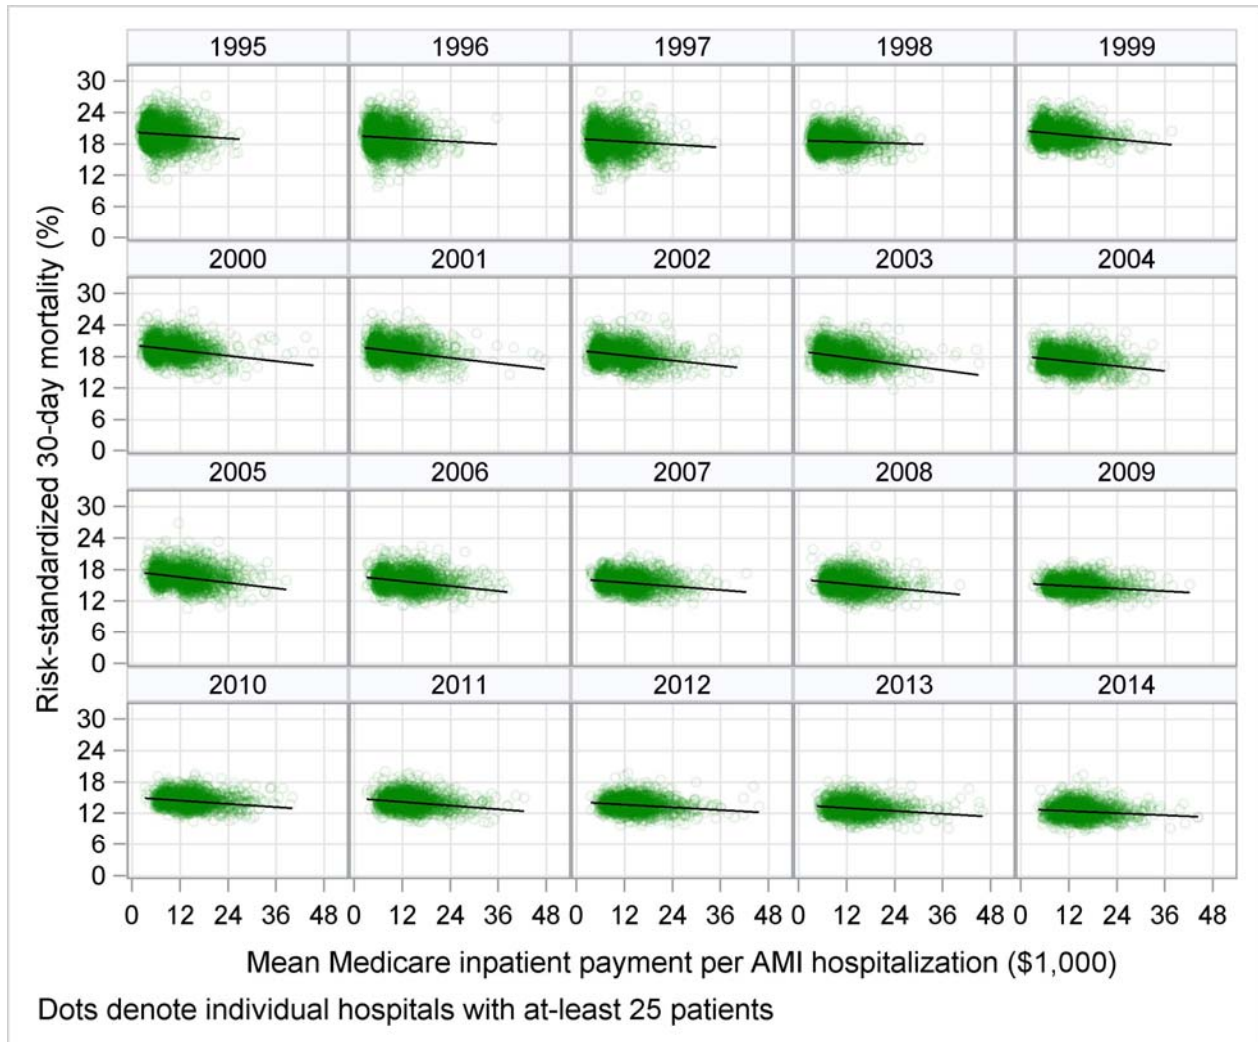

**eFigure 10. Annual changes in the 30-day rates of three common AMI-specific procedures (catheterization, CABG, and PCI).**

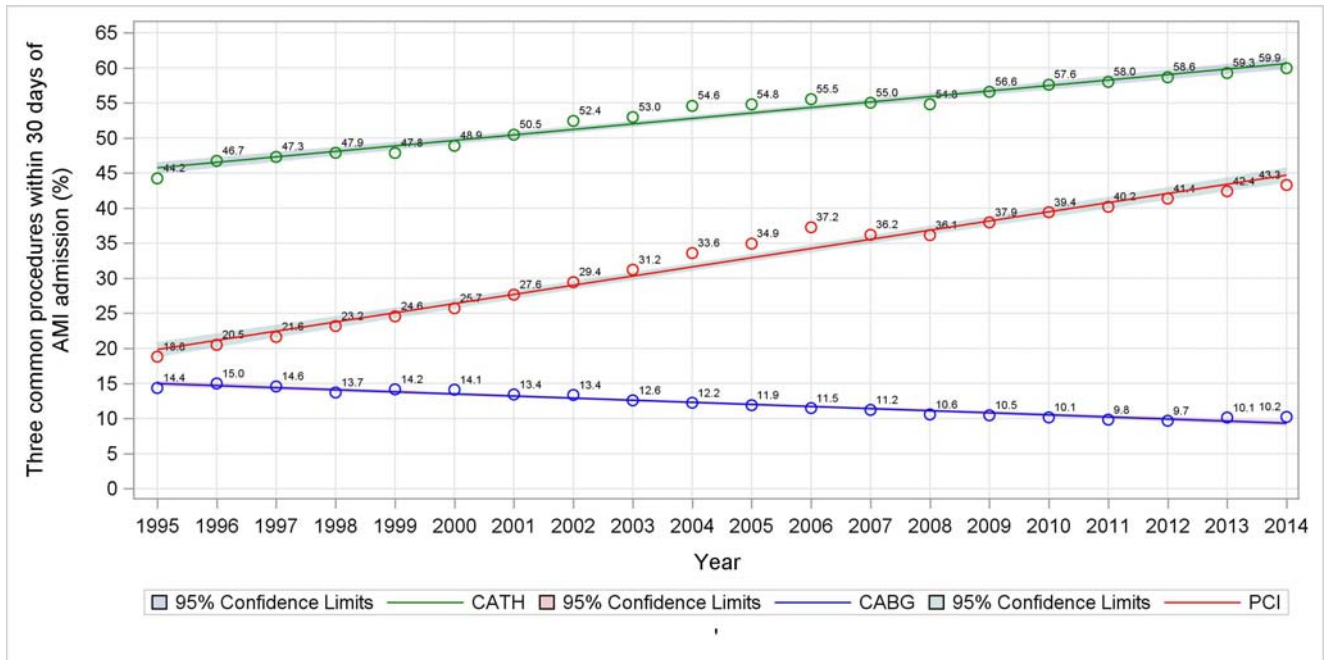

Supplement: jamanetwopen-2-e191938-s001.pdf [file jamanetwopen-2-e191938-s001.pdf]
